# Supplementary material for: Identification of Neuronal Pentraxins as Synaptic Binding Partners of C1q and the Involvement of NP1 in Synaptic Pruning in Adult Mice
Source: PubMed Central journal article supplement (PMC7897678; doi:10.3389/fimmu.2020.599771), 2021-02-08
Supplement: DataSheet_2.pdf [file DataSheet_2.pdf]

## Supplementary Material

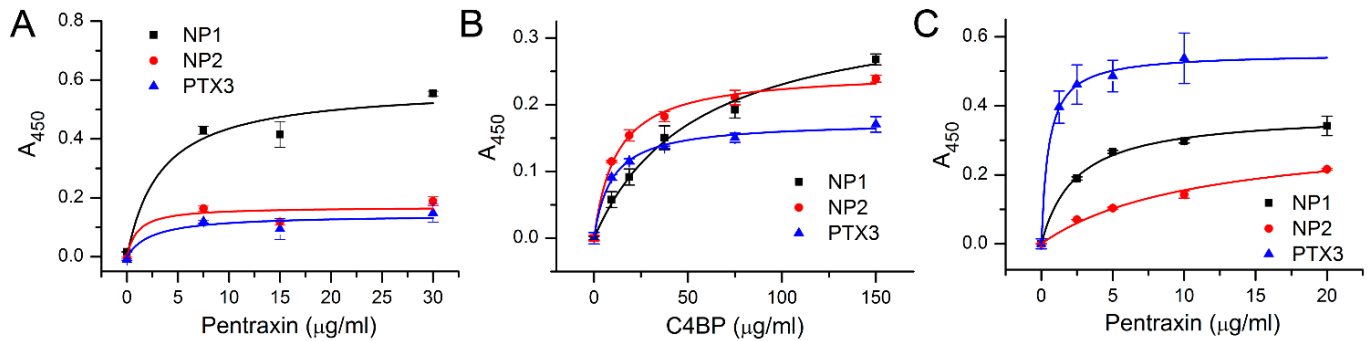

**Supplementary Figure 1.** Binding of neuronal pentraxins to C1q and inhibitors of the classical and alternative complement pathways. **(A)** ELISA assay by coating C1q to the plate and applying NP1, NP2, and PTX3 in the fluid phase (opposite arrangement to Figure 1a). Representative measurements are shown. **(B)** We investigated whether, analogously to PTX3, NPs bind to C4BP, the main soluble inhibitor of the classical pathway. NPs were coated in this experiment. Means  $\pm$  SEM;  $n = 4$ . **(C)** Factor-H, the main soluble inhibitor of the alternative pathway was coated. NPs in the fluid phase showed dose-dependent binding in this representative experiment. Means  $\pm$  SEM;  $n = 3$ . Plots were fitted with hyperbolic function.

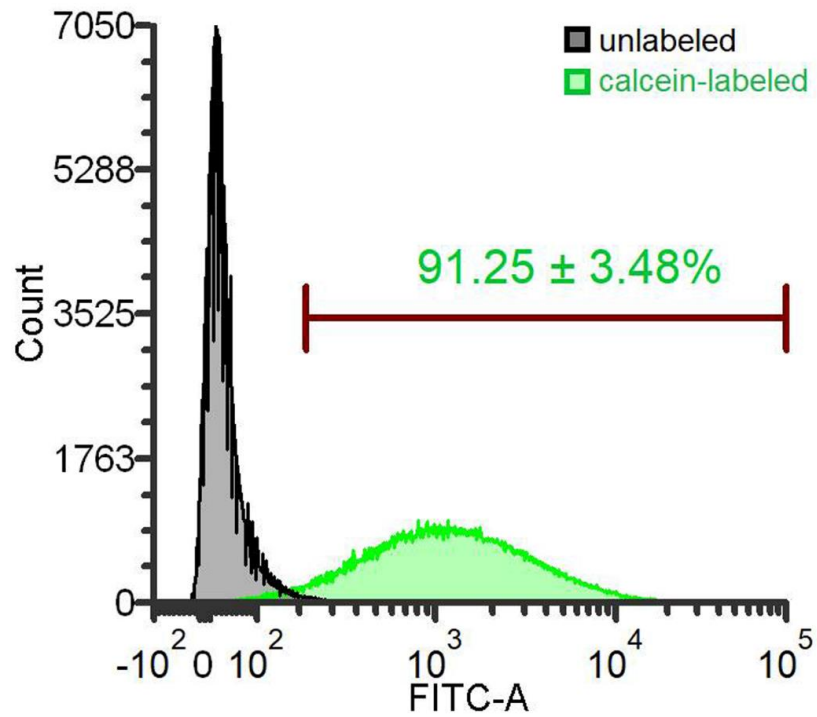

**Supplementary Figure 2.** Calcein-AM labeling was applied to test the viability of synaptosomes and validate the exclusive binding of antibodies to the synaptic surface. Calcein labeling was done separately and the calcein-labeled samples went through the same procedure as the antibody-labeled samples.

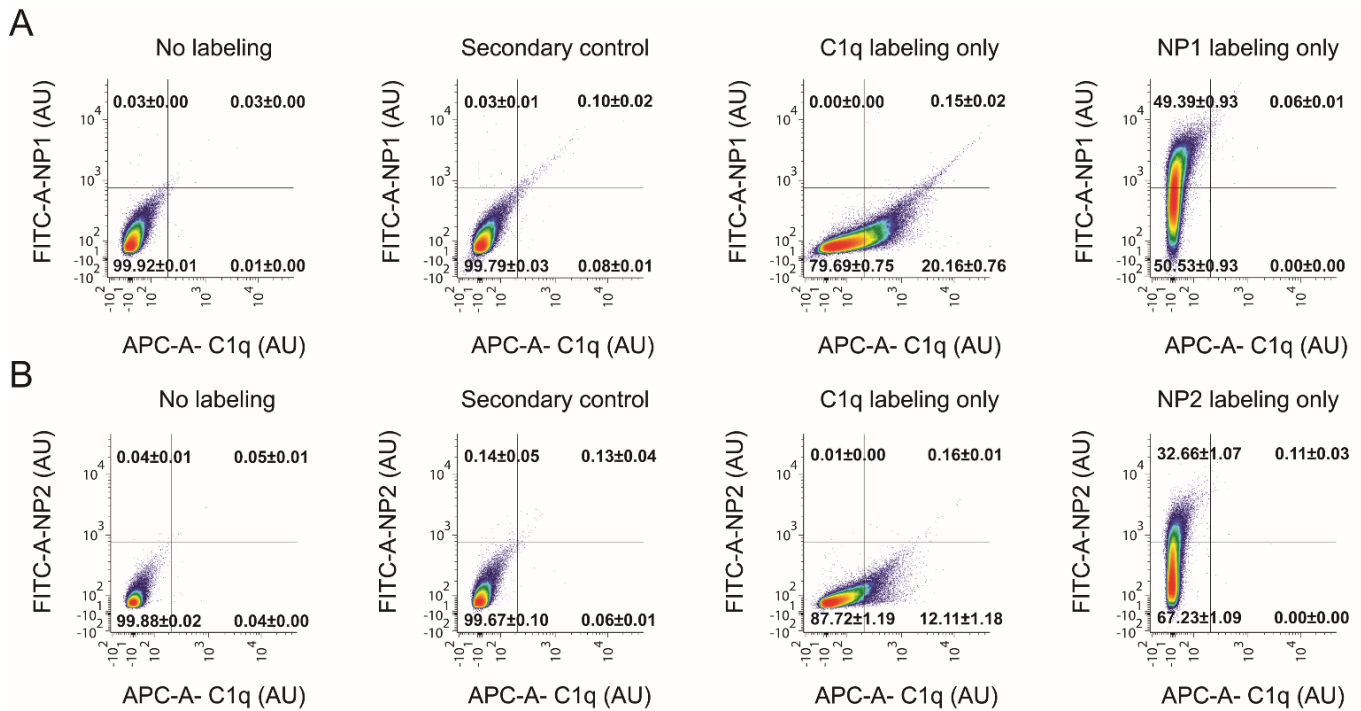

**Supplementary Figure 3.** FACS control measurements showing non-labeled, only secondary antibody-labeled, only primary antibody-labeled samples. These controls demonstrate that there is no spillover between the channels APC and FITC.

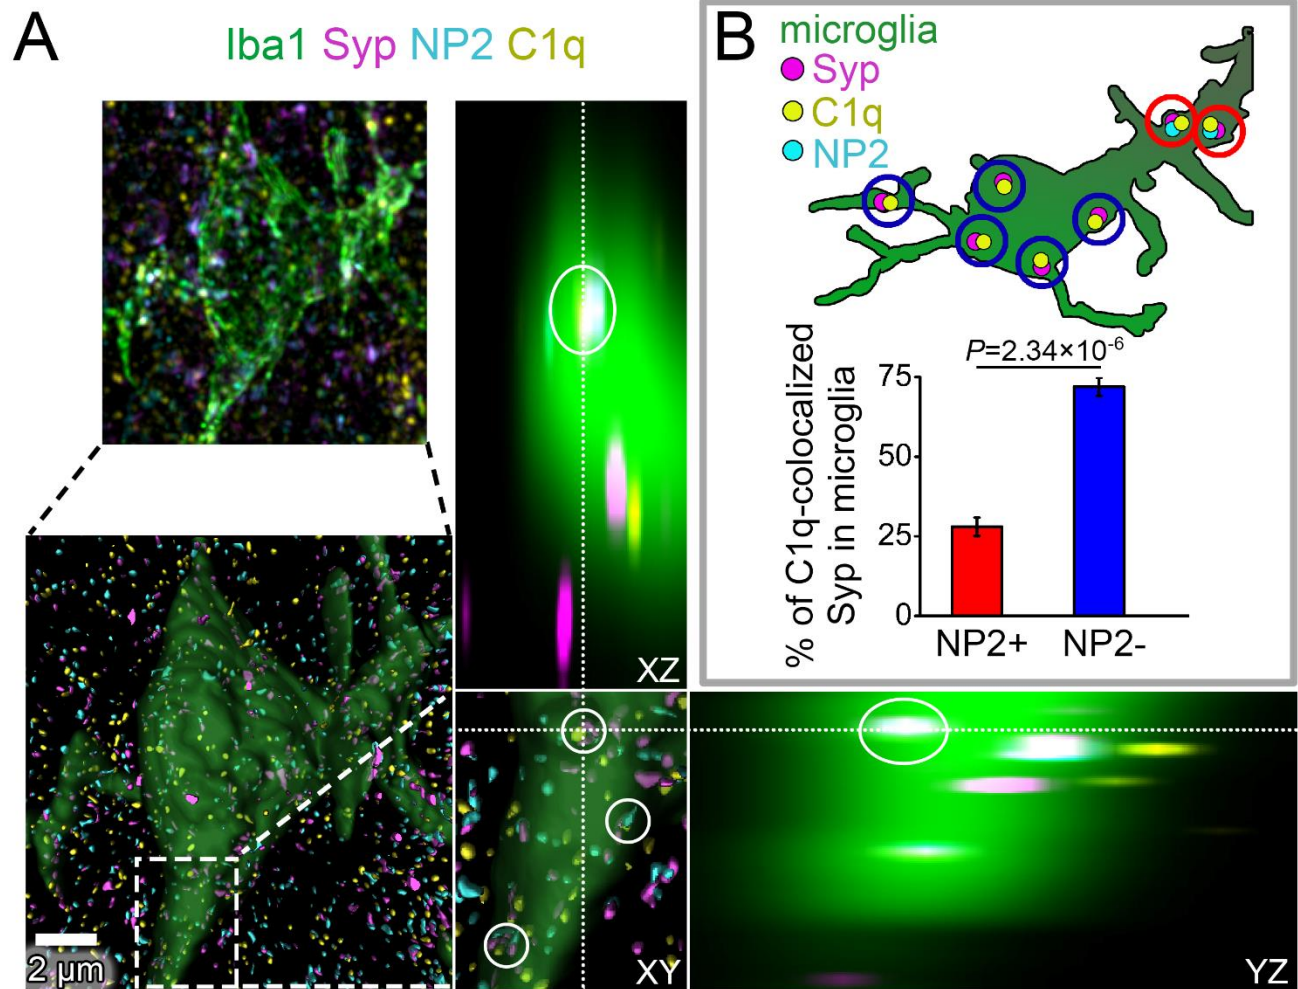

**Supplementary Figure 4.** Microglial engulfed C1q-tagged synapses are mostly NP2-negative. **(A)** Microglia were reconstructed using Iba1-staining and engulfed, C1q- and Syp-colocalized NP2 spots were identified on mouse brain sections (*white circles*). Orthogonal views demonstrate that microglia completely surround one of the phagocytosed C1q-tagged synaptic material with NP2 content. **(B)** Image analyses revealed that only  $28.01 \pm 2.88\%$  of C1q-tagged microglial Syp proteins are NP2-positive as well, while the majority of them lacks synaptic NP2. Means  $\pm$  SEM are shown;  $n = 16$  images recorded from brain sections of 3 mice. Statistically significant difference between groups was identified using two-tailed Student *t*-test of paired samples.
